# Supplementary material
Source: Springer Nature journal article supplement (https://www.springermedizin.de/resource/supplementary/12883_2010_431_MOESM3_ESM.pdf/9455426)

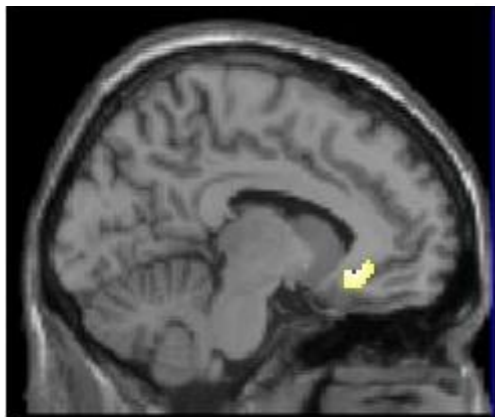

Z score

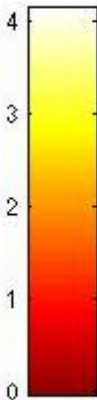

Left (X= -8)

Supplement: MOESM3 [file 9455426]
